# Supplementary material for: Selecting the best stable isotope mixing model to estimate grizzly bear diets in the Greater Yellowstone Ecosystem
Source: PubMed Central journal article supplement (PMC5426898; doi:10.1371/journal.pone.0174903), 2017-05-11
Supplement: pone.0174903.s002.pdf [file pone.0174903.s002.pdf]

S1 Table. Hair-snare locations (UTMs) in Cooke City Basin, Montana, 2007–2009.

---

| Locations       | Easting | Northing |
|-----------------|---------|----------|
| Fisher Creek    | 584268  | 4989786  |
| Miller Creek    | 583797  | 4987318  |
| Republic Creek  | 583768  | 4983319  |
| Sheep Creek     | 580375  | 4986850  |
| Woody Creek     | 586408  | 4985484  |
| Mud Lake        | 586444  | 4991119  |
| Still Water     | 581552  | 4990817  |
| Cooke City Face | 584625  | 4986762  |

---
