# Supplementary material for: Selecting the best stable isotope mixing model to estimate grizzly bear diets in the Greater Yellowstone Ecosystem
Source: PubMed Central journal article supplement (PMC5426898; doi:10.1371/journal.pone.0174903), 2017-05-11
Supplement: pone.0174903.s003.pdf [file pone.0174903.s003.pdf]

S2 Table. Discrimination-corrected stable isotope values and digestible elemental concentrations for major bear foods used to estimate the diets of grizzly bears in Cooke City Basin, Montana, 2007–2009.

Digest [N] & [C] = Digest N or C/Digest DM \* 100

Digest N = Digest protein \* 0.16 OR Digest N = %N\*1 for animals and 0.9 for plants

Digest C = determined by Phillips and Koch (2002)

Digest DM = see Lopez-Alfaro 2015

Digest protein = crude protein \* 1.0 for meat or 0.9 for veg and fruit (Koch and Phillips 2003)

Crude protein = %N \* 6.25

| Bear food                             | Raw stable isotope values |                       |                       | Stable isotope values corrected for isotopic discrimination |                       |                            |                       | Digestible elemental concentrations |     |
|---------------------------------------|---------------------------|-----------------------|-----------------------|-------------------------------------------------------------|-----------------------|----------------------------|-----------------------|-------------------------------------|-----|
|                                       | $\delta^{13}\text{C}$     | $\delta^{15}\text{N}$ | $\delta^{34}\text{S}$ | $\delta^{13}\text{C}$                                       | $\delta^{15}\text{N}$ | $\delta^{34}\text{S-corr}$ | $\delta^{34}\text{S}$ | [C]                                 | [N] |
| Whitebark pine seeds ( <i>n</i> = 31) |                           |                       |                       |                                                             |                       |                            |                       |                                     |     |
| <i>Pinus albicaulis</i>               | -22.4                     | -0.8                  | 7.8                   | -19.0                                                       | 1.6                   | -0.9                       | 6.9                   | 61.9                                | 8.9 |
| <i>Pinus albicaulis</i>               | -24.1                     | -2.4                  | 6.6                   | -20.7                                                       | 0.0                   | -0.6                       | 6.1                   | 61.9                                | 6.9 |
| <i>Pinus albicaulis</i>               | -23.0                     | 0.0                   | 7.6                   | -19.6                                                       | 2.4                   | -0.8                       | 6.8                   | 61.9                                | 7.5 |
| <i>Pinus albicaulis</i>               | -25.9                     | -1.0                  | 8.7                   | -22.5                                                       | 1.4                   | -1.1                       | 7.6                   | 61.9                                | 7.2 |
| <i>Pinus albicaulis</i>               | -23.3                     | 2.3                   | 9.1                   | -19.9                                                       | 4.7                   | -1.2                       | 7.9                   | 61.9                                | 8.2 |
| <i>Pinus albicaulis</i>               | -25.2                     | -1.3                  | 8.1                   | -21.8                                                       | 1.1                   | -1.0                       | 7.2                   | 61.9                                | 4.6 |
| <i>Pinus albicaulis</i>               | -23.7                     | -0.2                  | 8.2                   | -20.3                                                       | 2.2                   | -1.0                       | 7.3                   | 61.9                                | 7.6 |
| <i>Pinus albicaulis</i>               | -24.2                     | -1.4                  | 7.5                   | -20.8                                                       | 1.0                   | -0.8                       | 6.7                   | 61.9                                | 7.4 |
| <i>Pinus albicaulis</i>               | -25.8                     | -1.5                  | 7.4                   | -22.4                                                       | 0.9                   | -0.8                       | 6.7                   | 61.9                                | 6.0 |
| <i>Pinus albicaulis</i>               | -23.5                     | -2.1                  | 7.3                   | -20.1                                                       | 0.3                   | -0.7                       | 6.5                   | 61.9                                | 7.0 |
| <i>Pinus albicaulis</i>               | -24.0                     | -1.2                  | 8.7                   | -20.6                                                       | 1.2                   | -1.1                       | 7.6                   | 61.9                                | 7.7 |
| <i>Pinus albicaulis</i>               | -23.8                     | 1.7                   | 8.9                   | -20.4                                                       | 4.1                   | -1.2                       | 7.7                   | 61.9                                | 6.4 |
| <i>Pinus albicaulis</i>               | -23.2                     | 2.3                   | 8.4                   | -19.8                                                       | 4.7                   | -1.0                       | 7.4                   | 61.9                                | 6.9 |
| <i>Pinus albicaulis</i>               | -22.7                     | 2.0                   | 8.3                   | -19.3                                                       | 4.4                   | -1.0                       | 7.3                   | 61.9                                | 7.9 |
| <i>Pinus albicaulis</i>               | -23.6                     | -1.0                  | 8.4                   | -20.2                                                       | 1.4                   | -1.0                       | 7.4                   | 61.9                                | 7.2 |
| <i>Pinus albicaulis</i>               | -24.1                     | 2.4                   | 8.2                   | -20.7                                                       | 4.8                   | -1.0                       | 7.2                   | 61.9                                | 7.1 |
| <i>Pinus albicaulis</i>               | -24.2                     | 0.6                   | 9.3                   | -20.8                                                       | 3.0                   | -1.3                       | 8.0                   | 61.9                                | 7.9 |
| <i>Pinus albicaulis</i>               | -23.4                     | 0.6                   | 8.1                   | -20.0                                                       | 3.0                   | -1.0                       | 7.2                   | 61.9                                | 6.6 |
| <i>Pinus albicaulis</i>               | -22.4                     | 0.6                   | 8.1                   | -19.0                                                       | 3.0                   | -1.0                       | 7.2                   | 61.9                                | 8.3 |

|                         |       |      |     |       |     |      |     |      |     |
|-------------------------|-------|------|-----|-------|-----|------|-----|------|-----|
| <i>Pinus albicaulis</i> | -23.8 | 4.5  | 9.8 | -20.4 | 6.9 | -1.4 | 8.4 | 61.9 | 7.9 |
| <i>Pinus albicaulis</i> | -22.1 | -0.9 | 7.7 | -18.7 | 1.5 | -0.8 | 6.8 | 61.9 | 6.4 |
| <i>Pinus albicaulis</i> | -23.2 | 2.7  | 9.3 | -19.8 | 5.1 | -1.3 | 8.0 | 61.9 | 6.8 |
| <i>Pinus albicaulis</i> | -22.0 | 1.2  | 7.6 | -18.6 | 3.6 | -0.8 | 6.8 | 61.9 | 7.7 |
| <i>Pinus albicaulis</i> | -22.5 | 1.1  | 8.3 | -19.1 | 3.5 | -1.0 | 7.3 | 61.9 | 8.2 |
| <i>Pinus albicaulis</i> | -25.4 | 1.0  | 5.2 | -22.0 | 3.4 | -0.2 | 5.0 | 61.9 | 7.2 |
| <i>Pinus albicaulis</i> | -26.1 | 1.0  | 5.7 | -22.7 | 3.4 | -0.3 | 5.3 | 61.9 | 7.9 |
| <i>Pinus albicaulis</i> | -23.9 | 2.0  | 6.4 | -20.5 | 4.4 | -0.5 | 5.9 | 61.9 | 6.7 |
| <i>Pinus albicaulis</i> | -23.7 | -1.2 | 8.4 | -20.3 | 1.2 | -1.0 | 7.4 | 61.9 | 7.2 |
| <i>Pinus albicaulis</i> | -23.5 | 0.1  | 7.9 | -20.1 | 2.5 | -0.9 | 7.0 | 61.9 | 6.7 |
| <i>Pinus albicaulis</i> | -23.7 | 3.4  | 8.4 | -20.3 | 5.8 | -1.0 | 7.4 | 61.9 | 7.9 |
| <i>Pinus albicaulis</i> | -23.4 | 2.1  | 8.1 | -20.0 | 4.5 | -0.9 | 7.1 | 61.9 | 6.8 |
| Mean                    | -23.7 | 0.5  | 8.0 | -20.3 | 2.9 |      | 7.1 |      |     |
| 1 SD                    | 1.1   | 1.7  | 1.0 | 1.1   | 1.7 |      | 0.7 |      |     |

Plants ( $n = 43$ )

|                  |                                 |       |      |      |       |      |      |      |    |      |
|------------------|---------------------------------|-------|------|------|-------|------|------|------|----|------|
| bearberry        | <i>Arctostaphylos uva-ursi</i>  | -28.9 | -7.8 | -0.7 | -25.5 | -5.4 | 1.3  | 0.7  | 45 | 0.6  |
| strawberry       | <i>Fragaria</i>                 | -26.8 | -1.1 | 0.4  | -23.4 | 1.3  | 1.1  | 1.4  | 45 | 1.8  |
| currant          | <i>Ribes</i>                    | -26.5 | -3.3 | 4.7  | -23.1 | -0.9 | -0.1 | 4.6  | 45 | 1.7  |
| huckleberry      | <i>Vaccinium</i> spp            | -27.0 | -2.9 | 1.4  | -23.6 | -0.5 | 0.8  | 2.2  | 45 | 0.7  |
| huckleberry      | <i>Vaccinium</i> spp            | -26.2 | -4.5 | 2.3  | -22.8 | -2.1 | 0.6  | 2.9  | 45 | 0.7  |
| whortleberry     | <i>Vaccinium</i> spp            | -28.4 | -4.5 | 3.3  | -25.0 | -2.1 | 0.3  | 3.6  | 45 | 1.3  |
| spring beauty    | <i>Claytonia lanceolata</i>     | -28.6 | -2.4 | 3.0  | -25.2 | 0.0  | 0.4  | 3.4  | 45 | 6.1  |
| angelica         | <i>Angelica</i>                 | -27.4 | -1.0 | -2.5 | -24.0 | 1.4  | 1.8  | -0.7 | 45 | 8.9  |
| spring beauty    | <i>Claytonia lanceolata</i>     | -27.3 | 0.1  | 3.5  | -23.9 | 2.5  | 0.3  | 3.7  | 45 | 9    |
| fire-weed        | <i>Epilobium</i>                | -29.1 | -1.3 | 3.3  | -25.7 | 1.1  | 0.3  | 3.6  | 45 | 3.4  |
| glacier lily     | <i>Erythronium grandiflorum</i> | -24.8 | 3.7  | -0.6 | -21.4 | 6.1  | 1.3  | 0.7  | 45 | 9.3  |
| cow parsnip      | <i>Heracleum lanatum</i>        | -26.8 | 0.3  | -2.3 | -23.4 | 2.7  | 1.8  | -0.5 | 45 | 14   |
| fern-leaf lovage | <i>Ligusticum filicinum</i>     | -27.5 | -1.4 | 4.5  | -24.1 | 1.0  | 0.0  | 4.5  | 45 | 10.3 |
| dandelion        | <i>Taraxacum</i>                | -29.4 | 0.8  | -2.4 | -26.0 | 3.2  | 1.8  | -0.6 | 45 | 7.1  |
| elk thistle      | <i>Cirsium Scariosum</i>        | -27.5 | -0.2 | 3.6  | -24.1 | 2.2  | 0.2  | 3.8  | 45 | 10   |
| Spring beauty    | <i>Claytonia lanceolata</i>     | -28.2 | 0.8  | 3.4  | -24.8 | 3.2  | 0.3  | 3.7  | 45 | 11.6 |
| glacier lily     | <i>Erythronium grandiflorum</i> | -26.6 | -2.1 | 3.2  | -23.2 | 0.3  | 0.3  | 3.5  | 45 | 8.7  |
| cow parsnip      | <i>Heracleum lanatum</i>        | -27.2 | 1.7  | -1.2 | -23.8 | 4.1  | 1.5  | 0.2  | 45 | 12.4 |
| fern-leaf lovage | <i>Ligusticum filicinum</i>     | -28.3 | -2.1 | 5.4  | -24.9 | 0.3  | -0.2 | 5.2  | 45 | 7.8  |
| licorice root    | <i>Osmorhiza</i>                | -30.2 | 0.4  | 1.3  | -26.8 | 2.8  | 0.8  | 2.1  | 45 | 13.7 |

|                           |                                 |       |      |      |       |      |      |      |      |      |
|---------------------------|---------------------------------|-------|------|------|-------|------|------|------|------|------|
| dandelion                 | Taraxacum                       | -28.6 | 0.2  | -3.0 | -25.2 | 2.6  | 1.9  | -1.1 | 45   | 6.1  |
| clover                    | Trifolium                       | -28.9 | -1.7 | 11.6 | -25.5 | 0.7  | -1.8 | 9.7  | 45   | 9.5  |
| biscuit root              | Lomatium                        | -28.4 | -0.3 | 2.7  | -25.0 | 2.2  | 0.5  | 3.2  | 45   | 9.9  |
| licorice root             | Osmorhiza                       | -28.6 | -5.0 | 2.3  | -25.2 | -2.6 | 0.6  | 2.8  | 45   | 1.7  |
| elk thistle               | <i>Cirsium scariosum</i>        | -27.2 | 1.4  | -7.7 | -23.8 | 3.8  | 3.2  | -4.5 | 45   | 3.2  |
| elk thistle               | <i>Cirsium scariosum</i>        | -26.8 | 1.4  | 4.8  | -23.4 | 3.8  | -0.1 | 4.7  | 45   | 4.7  |
| glacier lily              | <i>Erythronium grandiflorum</i> | -24.8 | 2.5  | -1.1 | -21.4 | 4.9  | 1.5  | 0.3  | 45   | 2.3  |
| biscuit root              | Lomatium                        | -28.1 | -2.9 | 0.2  | -24.7 | -0.5 | 1.1  | 1.3  | 45   | 1.4  |
| elk thistle               | <i>Cirsium scariosum</i>        | -26.8 | 6.3  | 2.1  | -23.4 | 8.7  | 0.6  | 2.7  | 45   | 3.2  |
| cow parsnip               | <i>Heracleum lanatum</i>        | -25.4 | -0.7 | -3.0 | -22.0 | 1.7  | 1.9  | -1.0 | 45   | 4.3  |
| angelica                  | Angelica                        | -27.3 | -0.9 | -2.3 | -23.9 | 1.5  | 1.8  | -0.5 | 45   | 4.1  |
| carex                     | Carex                           | -26.5 | 3.5  | -5.3 | -23.1 | 5.9  | 2.5  | -2.7 | 45   | 6.7  |
| horsetail                 | <i>Equisetum arvense</i>        | -29.2 | 4.1  | 0.0  | -25.8 | 6.5  | 1.2  | 1.2  | 45   | 5.2  |
| yampa                     | <i>Pedicularis</i> spp.         | -30.2 | -6.6 | 4.2  | -26.8 | -4.2 | 0.1  | 4.3  | 45   | 3.3  |
| fire-weed                 | Epilobium                       | -28.7 | -1.4 | 3.5  | -25.3 | 1.0  | 0.2  | 3.8  | 45   | 7.8  |
| yampa                     | <i>Perideridia gairdnerii</i>   | -26.1 | 2.1  | -1.6 | -22.7 | 4.5  | 1.6  | 0.0  | 45   | 2.2  |
| chives                    | <i>Allium</i> spp.              | -26.9 | -0.6 | 2.2  | -23.5 | 1.8  | 0.6  | 2.8  | 45   | 6.3  |
| sticky geranium           | <i>Geranium viscosissimum</i>   | -26.7 | 0.9  | 4.1  | -23.3 | 3.3  | 0.1  | 4.2  | 45   | 6.4  |
| graminoid                 | Agropyron                       | -26.9 | -0.8 | 2.7  | -23.5 | 1.6  | 0.5  | 3.2  | 45   | 4    |
| graminoid                 | Elymus                          | -28.8 | -2.8 | 2.2  | -25.4 | -0.4 | 0.6  | 2.8  | 45   | 4.7  |
| bracted lousewort         | <i>Pedicularis</i> spp.         | -29.6 | -0.2 | 4.4  | -26.2 | 2.2  | 0.0  | 4.4  | 45   | 8.2  |
| graminoid                 | Phleum                          | -27.5 | 1.6  | 0.1  | -24.1 | 4.0  | 1.1  | 1.2  | 45   | 3.8  |
| graminoid                 | Poa                             | -26.3 | 0.6  | 6.0  | -22.9 | 3.0  | -0.4 | 5.6  | 45   | 3    |
|                           | Mean                            | -27.6 | -0.6 | 1.5  | -24.2 | 1.8  |      | 2.2  |      |      |
|                           | 1 SD                            | 1.3   | 2.8  | 3.4  | 1.3   | 2.8  |      | 2.5  |      |      |
| Ungulates ( <i>n</i> = 8) |                                 |       |      |      |       |      |      |      |      |      |
| bison                     | <i>Bison bison</i>              | -24.6 | 4.4  | 1.6  | -22.5 | 8.3  | 0.8  | 2.3  | 51.5 | 16.2 |
| bison                     | <i>Bison bison</i>              | -24.2 | 3.5  | -0.7 | -22.1 | 7.4  | 1.3  | 0.6  | 51.5 | 14.6 |
| elk                       | <i>Cervus elaphus</i>           | -25.2 | 2.6  | 5.2  | -23.1 | 6.5  | -0.2 | 5.0  | 51.5 | 15.3 |
| elk                       | <i>Cervus elaphus</i>           | -24.9 | 5.1  | 3.0  | -22.8 | 9.0  | 0.4  | 3.4  | 51.5 | 15.1 |
| mule deer                 | <i>Odocoileus hemionus</i>      | -24.1 | 4.0  | 4.3  | -22.0 | 7.9  | 0.0  | 4.3  | 51.5 | 16.1 |
| mule deer                 | <i>Odocoileus hemionus</i>      | -24.9 | 2.2  | 4.6  | -22.8 | 6.1  | 0.0  | 4.5  | 51.5 | 15.8 |
| mule deer                 | <i>Odocoileus hemionus</i>      | -25.6 | 2.0  | 0.2  | -23.5 | 5.9  | 1.1  | 1.3  | 51.5 | 15   |
| mule deer                 | <i>Odocoileus hemionus</i>      | -25.0 | 4.0  | -0.2 | -22.9 | 7.9  | 1.2  | 1.0  | 51.5 | 15.1 |

|                                 |                            |       |     |     |       |      |     |     |      |      |
|---------------------------------|----------------------------|-------|-----|-----|-------|------|-----|-----|------|------|
|                                 | Mean                       | -24.8 | 3.5 | 2.2 | -22.7 | 7.4  |     | 2.8 |      |      |
|                                 | 1 SD                       | 0.5   | 1.1 | 2.3 | 0.5   | 1.1  |     | 1.7 |      |      |
| Cutthroat trout ( <i>n</i> = 6) |                            |       |     |     |       |      |     |     |      |      |
|                                 | <i>Oncorhynchus clarki</i> | -21.2 | 6.7 | 2.0 | -19.1 | 10.6 | 0.7 | 2.6 | 54.8 | 14.4 |
|                                 | <i>Oncorhynchus clarki</i> | -18.9 | 7.0 | 0.5 | -16.8 | 10.9 | 1.0 | 1.5 | 54.8 | 12.5 |
|                                 | <i>Oncorhynchus clarki</i> | -20.8 | 7.0 | 0.2 | -18.7 | 10.9 | 1.1 | 1.3 | 54.8 | 5.6  |
|                                 | <i>Oncorhynchus clarki</i> | -15.4 | 7.2 | 0.6 | -13.3 | 11.1 | 1.0 | 1.6 | 54.8 | 14.1 |
|                                 | <i>Oncorhynchus clarki</i> | -16.5 | 7.9 | 0.5 | -14.4 | 11.8 | 1.0 | 1.5 | 54.8 | 12.3 |
|                                 | <i>Oncorhynchus clarki</i> | -22.2 | 6.9 | 0.7 | -20.1 | 10.8 | 1.0 | 1.7 | 54.8 | 10.8 |
|                                 | Mean                       | -19.2 | 7.1 | 0.7 | -17.1 | 11.0 |     | 1.7 |      |      |
|                                 | 1 SD                       | 2.7   | 0.4 | 0.6 | 2.7   | 0.4  |     | 0.5 |      |      |

---
