# Supplementary material for: Selecting the best stable isotope mixing model to estimate grizzly bear diets in the Greater Yellowstone Ecosystem
Source: PubMed Central journal article supplement (PMC5426898; doi:10.1371/journal.pone.0174903), 2017-05-11
Supplement: pone.0174903.s004.pdf [file pone.0174903.s004.pdf]

S3 Table. Estimated proportional dietary contributions for grizzly bears sampled in Cooke City Basin, Montana in 2007–2009 using 4-source concentration dependence SIMMs with no random sex or time effects (CNS(CD) ~ (1|Bear)).

| Source                                                        | Pop-level |      | Credible interval |      |       |
|---------------------------------------------------------------|-----------|------|-------------------|------|-------|
|                                                               | $\bar{x}$ | 1 SD | 2.5%              | 50%  | 97.5% |
| $\delta^{13}\text{C}/\delta^{15}\text{N}/\delta^{34}\text{S}$ |           |      |                   |      |       |
| Plants                                                        | 55.1      | 9.0  | 36.4              | 55.4 | 71.5  |
| Trout                                                         | 0.9       | 1.7  | 0.0               | 0.0  | 6.3   |
| Ungulates                                                     | 12.0      | 10.4 | 0.0               | 10.8 | 36.0  |
| Whitebark                                                     | 32.1      | 8.0  | 15.8              | 32.2 | 47.4  |
| $\delta^{13}\text{C}/\delta^{15}\text{N}$                     |           |      |                   |      |       |
| Plants                                                        | 57.3      | 9.9  | 37.2              | 57.5 | 76.2  |
| Trout                                                         | 0.8       | 1.5  | 0.0               | 0.2  | 5.6   |
| Ungulates                                                     | 8.4       | 6.4  | 0.1               | 7.8  | 23.0  |
| Whitebark                                                     | 33.5      | 9.1  | 16.6              | 33.1 | 52.7  |
| $\delta^{34}\text{S}/\delta^{15}\text{N}$                     |           |      |                   |      |       |
| Plants                                                        | 56.7      | 10.5 | 36.2              | 56.6 | 77.9  |
| Trout                                                         | 0.8       | 2.0  | 0.0               | 0.0  | 7.7   |
| Ungulates                                                     | 5.0       | 5.9  | 0.0               | 2.7  | 19.0  |
| Whitebark                                                     | 37.4      | 10.9 | 14.5              | 37.8 | 57.6  |
