# Supplementary material for: Selecting the best stable isotope mixing model to estimate grizzly bear diets in the Greater Yellowstone Ecosystem
Source: PubMed Central journal article supplement (PMC5426898; doi:10.1371/journal.pone.0174903), 2017-05-11
Supplement: pone.0174903.s005.pdf [file pone.0174903.s005.pdf]

S4 Table. PED model selection results for SIMMs used to estimate the diets of bears sampled in Cooke City Basin, Montana, 2007–2009.

| Candidate set                                                 | Model         | <i>PED</i> | $\Delta$ <i>PED</i> | Rescaled<br><i>PED</i> | Rescaled<br>$\Delta$ <i>PED</i> |
|---------------------------------------------------------------|---------------|------------|---------------------|------------------------|---------------------------------|
| $\delta^{13}\text{C}/\delta^{15}\text{N}/\delta^{34}\text{S}$ | No C-D (Null) | 1722.23    | 895.58              | 1168.28                | 621.39                          |
|                                                               | C-D           | 826.65     | 0.00                | 588.84                 | 41.95                           |
|                                                               | C-D, Sex      | 836.30     | 9.65                | 597.32                 | 50.43                           |
|                                                               | C-D, Year     | 844.36     | 17.72               | 606.38                 | 59.49                           |
|                                                               | C-D, 4-source | 904.05     | 77.40               | 654.79                 | 107.90                          |
|                                                               | Mean          |            |                     |                        |                                 |
| $\delta^{13}\text{C}/\delta^{15}\text{N}$                     | No C-D (Null) | 823.17     | 276.28              | 823.17                 | 276.28                          |
|                                                               | C-D           | 546.89     | 0.00                | 546.89                 | 0.00                            |
|                                                               | C-D, Sex      | 554.94     | 8.06                | 554.94                 | 8.06                            |
|                                                               | C-D, Year     | 551.91     | 5.02                | 551.91                 | 5.02                            |
|                                                               | C-D, 4-source | 618.82     | 71.93               | 618.82                 | 71.93                           |
|                                                               | Mean          |            |                     |                        |                                 |
| $\delta^{15}\text{N}/\delta^{34}\text{S}$                     | No C-D (Null) | 1586.50    | 281.87              | 1586.50                | 1039.61                         |
|                                                               | C-D           | 1304.63    | 0.00                | 1304.63                | 757.74                          |
|                                                               | C-D, Sex      | 1307.59    | 2.96                | 1307.59                | 760.70                          |
|                                                               | C-D, Year     | 1308.57    | 3.94                | 1308.57                | 761.69                          |
|                                                               | C-D, 4-source | 1371.49    | 66.86               | 1371.49                | 824.60                          |
|                                                               | Mean          |            |                     |                        |                                 |
