# Supplementary material for: Selecting the best stable isotope mixing model to estimate grizzly bear diets in the Greater Yellowstone Ecosystem
Source: PubMed Central journal article supplement (PMC5426898; doi:10.1371/journal.pone.0174903), 2017-05-11
Supplement: pone.0174903.s006.pdf [file pone.0174903.s006.pdf]

S5 Table. Probability of similarity of mean marginal posterior distributions for different foods estimated by concentration dependence SIMMs with no random sex or time effects (top models in each candidate set).

| Models     | Sources   | Probability of similarity |
|------------|-----------|---------------------------|
| CNS vs. CN | Plants    | 0.89                      |
|            | Ungulates | 0.70                      |
|            | Whitebark | 0.81                      |
| CNS vs. SN | Plants    | 0.86                      |
|            | Ungulates | 0.48                      |
|            | Whitebark | 0.69                      |
| CN vs. SN  | Plants    | 1.00                      |
|            | Ungulates | 0.79                      |
|            | Whitebark | 0.88                      |
